# Supplementary material for: High energy and power density Li–O2 battery cathodes based on amorphous RuO2 loaded carbon free and binderless nickel nanofoam architectures
Source: Royal Society of Chemistry journal article supplement (doi:10.1039/c6ra13007k), 2016-01-01
Supplement: c6ra13007k1.pdf [file c6ra13007k1.pdf]

## Supporting Information

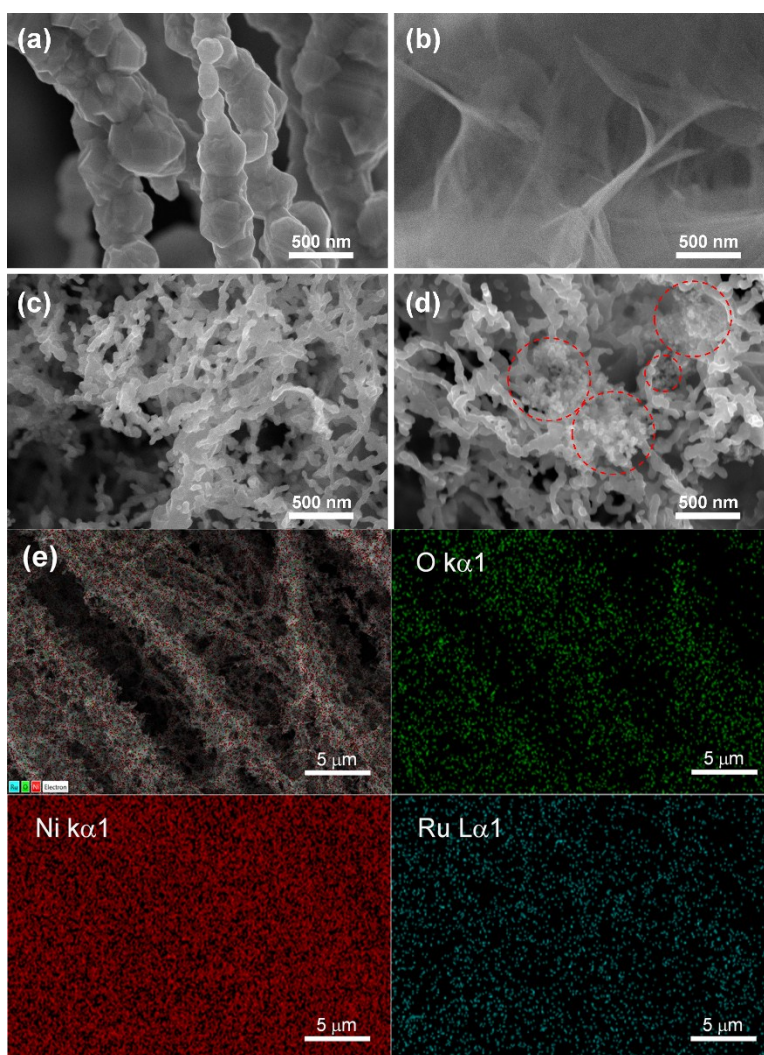

**Fig. S1** High resolution SEM images of (a) Ni nanowires, (b) Ni oxalate nanowires, (c) Ni nanofoam, and (d) RuO<sub>2</sub>/Ni NF, where the red circles indicate RuO<sub>2</sub> deposition. (e) EDX mapping of RuO<sub>2</sub>/Ni NF.

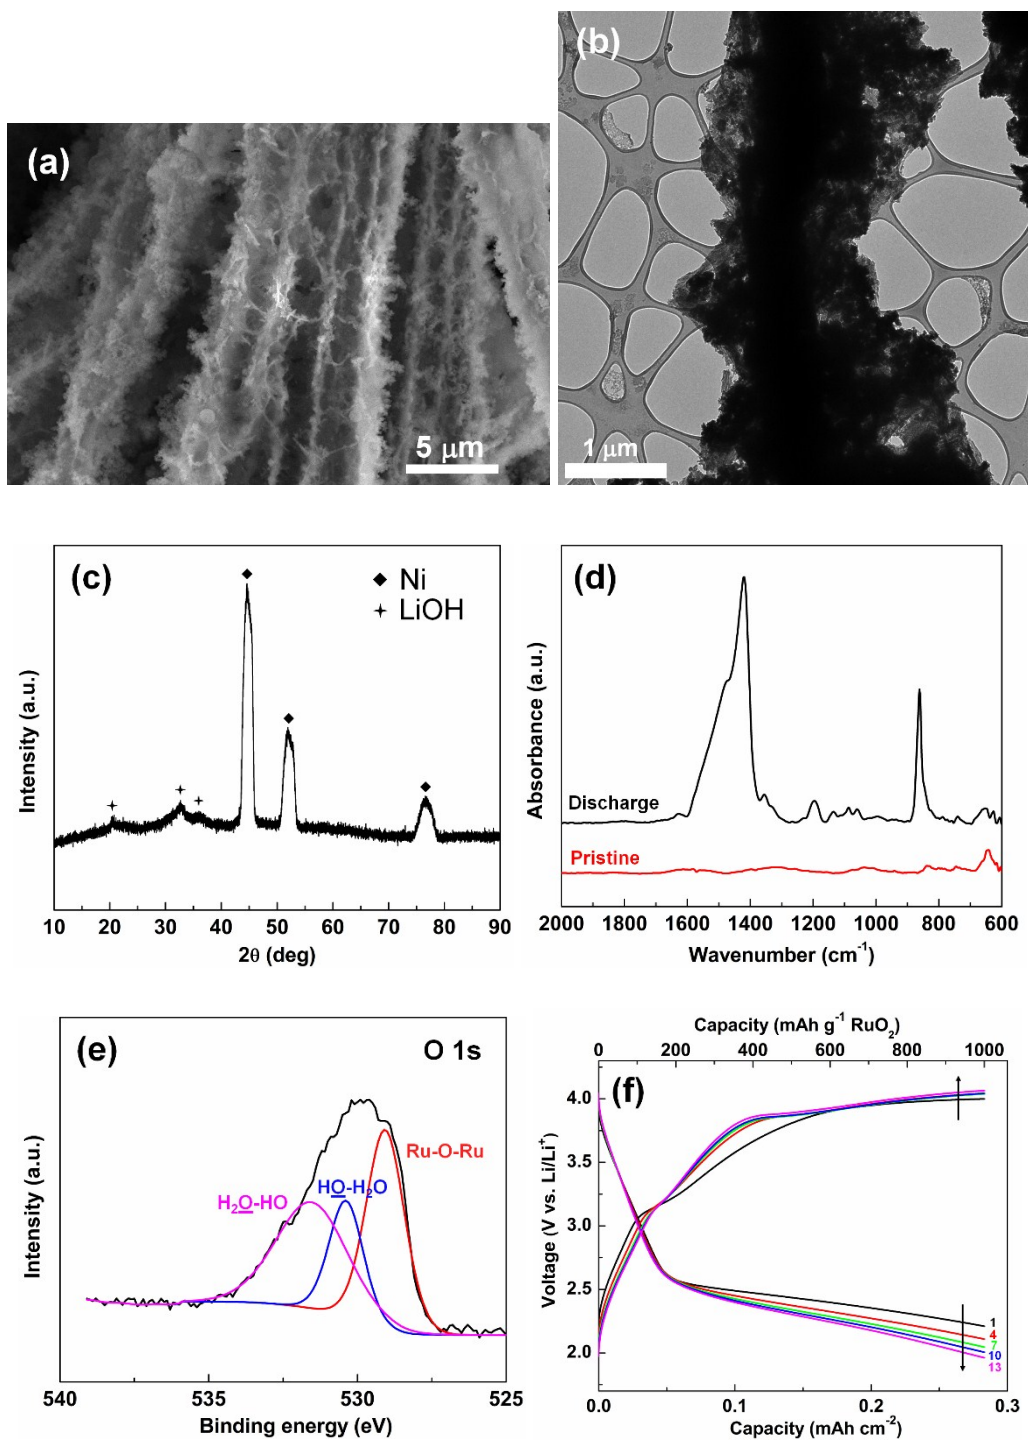

**Fig. S2** (a) SEM and (b) TEM image and (c) XRD pattern of fully discharged  $\text{RuO}_2/\text{Ni}$  NF electrode. (d) ATR-FTIR measurement of pristine and discharged  $\text{RuO}_2/\text{Ni}$  NF electrode. (e) XPS spectra of O 1s of  $\text{RuO}_2$  nanoflakes demonstrate the hyrous nature with OH and  $\text{H}_2\text{O}$  hydrogen

bonded to each other.<sup>[1]</sup> (f) Charge-discharge curves in 13 cycles of RuO<sub>2</sub>/Ni NF at 0.1 mA cm<sup>-2</sup> with capacity limit 0.28 mAh cm<sup>-2</sup> (1000 mAh g<sup>-1</sup> RuO<sub>2</sub>) after 3 full CV cycles of 2.0-4.0 V at 0.1 mV s<sup>-1</sup>. The arrows indicate gradual decrease and increase of the discharge and charge potentials, respectively.

## References

[1] C. Liu, C. Li, K. Ahmed, W. Wang, I. Lee, F. Zaera, C. S. Ozkan and M. Ozkan, *Adv. Mater. Interfaces*, 2016, 3, 1500503.
